# Supplementary material
Source: Springer Nature journal article supplement (https://www.springermedizin.de/resource/supplementary/12882_2013_671_MOESM3_ESM.pdf/9454092)

ml/min/1.73m<sup>2</sup>

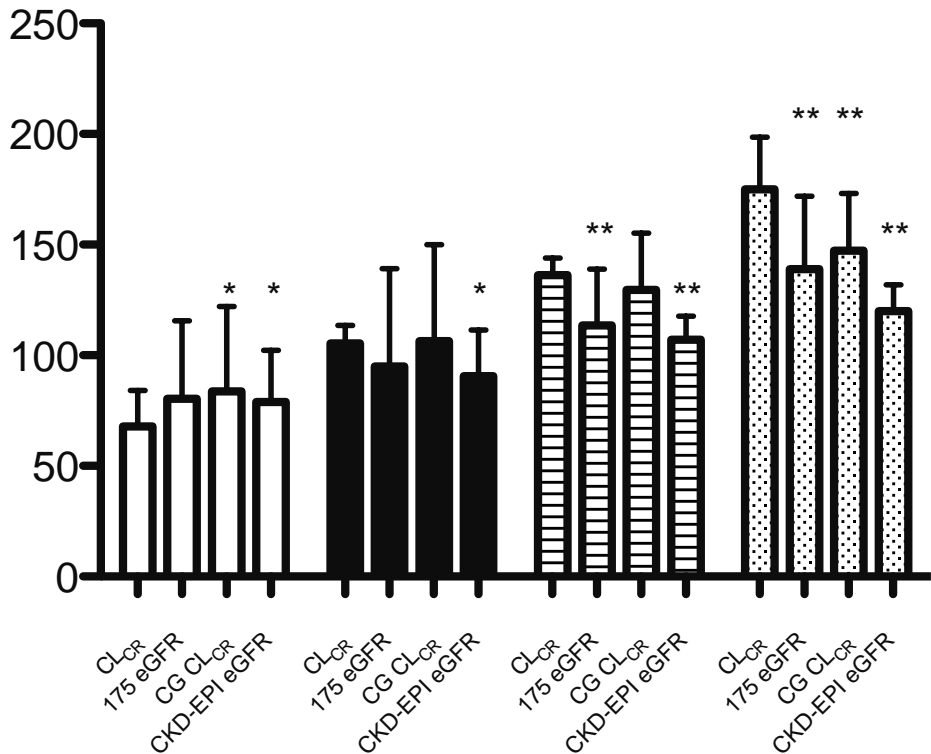

Supplement: MOESM3 [file 9454092]
